# Supplementary material for: Effectiveness and safety of secukinumab in 608 patients with psoriatic arthritis in real life: a 24-month prospective, multicentre study
Source: HighWire-hosted journal article supplement (doi:10.1136/rmdopen-2020-001519), 2021-02-01
Supplement: rmdopen-2020-001519supp001_data_supplement.pdf [file rmdopen-2020-001519supp001_data_supplement.pdf]

**Supplementary Table 1. Baseline characteristics of male (n=249) and female (n=359) PsA patients treated with SEC.**

| PsA Features                                | MALE                | vs. FEMALE          | <i>p</i> |
|---------------------------------------------|---------------------|---------------------|----------|
| Male sex (N,%)                              | 249 (100%)          | 0 (0%)              | NA       |
| Age (years), mean (SD)                      | 51.45 (11.21)       | 53.70 (11.34)       | ns       |
| Age of diagnosis (years), mean (SD)         | 43.09 (10.84)       | 45.87 (11.82)       | ns       |
| Age of disease onset (years), mean (SD)     | 40.12 (13.02)       | 43.25 (13.96)       | ns       |
| Disease duration (years), mean (SD)         | 9.92 (7.08)         | 9.20 (6.68)         | ns       |
| PsA (n,%)                                   | <b>249 (40.95%)</b> | <b>359 (59.05%)</b> | NA       |
| Polyarticular                               | 138 (55.42%)        | 225 (62.67%)        | ns       |
| Mono/Oligoarticular                         | 74 (29.72%)         | 89 (24.79%)         | ns       |
| Axial                                       | 68 (27.31%)         | 78 (21.73%)         | ns       |
| Only involvement DIP                        | 3 (1.20%)           | 6 (1.67%)           | ns       |
| Mutilating arthritis                        | 0 (0%)              | 3 (0.83%)           | ns       |
| Enthesitis                                  | 117 (46.99%)        | 147 (40.95%)        | ns       |
| Dactylitis                                  | 52 (20.88%)         | 45 (12.53%)         | 0.05     |
| Psoriasis, N (%)                            | 186 (74.70%)        | 232 (64.62%)        | 0.05     |
| Age of psoriasis onset (years), mean (SD)   | 24.12 (18.32)       | 23.24 (20.77)       | ns       |
| Onychopathy, N (%)                          | 99 (39.76%)         | 123 (34.26%)        | ns       |
| IBD, N (%)                                  | 7 (2.81%)           | 4 (1.11%)           | ns       |
| Uveitis, N (%)                              | 7 (2.81%)           | 18 (5.01%)          | ns       |
| Familiarity with psoriasis or PsA           | 89 (35.74%)         | 95 (26.46%)         | ns       |
| Erosions, N (%)                             | 76 (30.52%)         | 98 (27.30%)         | ns       |
| Weight (kg), mean (SD)                      | 81.08 (12.68)       | 68.59 (15.08)       | 0.02     |
| Height (cm), mean (SD)                      | 174.31 (7.04)       | 161.43 (13.91)      | 0.04     |
| BMI, mean (SD)                              | 26.58 (3.64)        | 25.91 (6.05)        | ns       |
| TJ [0-68], mean (SD)                        | 6.17 (5.23)         | 9.30 (7.47)         | 0.05     |
| SJ [0-66], mean (SD)                        | 2.18 (2.45)         | 2.29 (3.05)         | ns       |
| LEI [0-6], mean (SD)                        | 2.34 (1.61)         | 2.82 (1.95)         | ns       |
| Dactylitis [0-20] number digit, mean (SD)   | 0.23 (0.82)         | 0.31 (1.51)         | ns       |
| PASI [0-72], mean (SD)                      | 4.96 (7.29)         | 3.70 (7.42)         | 0.05     |
| ESR [0-25](mm/h), mean (SD)                 | 18.99 (18.67)       | 22.59 (15.76)       | 0.04     |
| CRP [0-6](mg/L), mean (SD)                  | 7.54 (12.10)        | 5.70 (7.79)         | ns       |
| DAPSA [0-164], mean (SD)                    | 23.77 (11.73)       | 26.35 (10.60)       | ns       |
| ASDAS [0-6], mean (SD)                      | 3.04 (0.89)         | 3.44 (3.76)         | ns       |
| HAQ-S [0-8], mean (SD)                      | 1.09 (0.67)         | 1.42 (0.91)         | ns       |
| VAS-pain [0-10], mean (SD)                  | 6.50 (1.78)         | 6.84 (1.56)         | ns       |
| VAS-gh [0-10], mean (SD)                    | 6.56 (1.54)         | 6.84 (4.44)         | ns       |
| BASDAI [0-10], mean (SD)                    | 5.18 (2.17)         | 5.25 (2.19)         | ns       |
| BASFI [0-10], mean (SD)                     | 5.16 (2.27)         | 5.19 (2.05)         | ns       |
| Mean treatment duration (months), mean (SD) | 19.48 (10.88)       | 18.27 (11.40)       | ns       |
| Dosage 300 mg/injection (N,%)               | 136 (54.62%)        | 196 (54.60%)        | ns       |
| Dosage 150 mg/injection (N,%)               | 113 (45.38%)        | 163 (45.40%)        | ns       |
| 1 <sup>st</sup> line (N,%)                  | 96 (38.55%)         | 131 (36.49%)        | ns       |
| Failure biological drugs (N,%)              | 153 (61.45%)        | 228 (63.51%)        | ns       |
| 2 <sup>nd</sup> line (N,%)                  | 59 (23.69%)         | 90 (25.07%)         | ns       |

|                                          |              |              |             |
|------------------------------------------|--------------|--------------|-------------|
| <b>3<sup>rd</sup> line (N,%)</b>         | 50 (20.08%)  | 64 (17.83%)  | <i>ns</i>   |
| <b>4<sup>th</sup> line (N,%)</b>         | 29 (11.65%)  | 46 (12.81%)  | <i>ns</i>   |
| <b>5<sup>th</sup> line (N,%)</b>         | 12 (4.82%)   | 14 (3.90%)   | <i>ns</i>   |
| <b>6<sup>th</sup> line (N,%) or more</b> | 5 (2.01%)    | 14 (3.90%)   | <i>ns</i>   |
| <b>Concomitant NSAIDs, N (%)</b>         | 121 (48.59%) | 193 (53.76%) | <i>ns</i>   |
| <b>Concomitant steroid, N (%)</b>        | 66 (26.51%)  | 96 (26.74%)  | <i>ns</i>   |
| <b>Concomitant csDMARDs, N (%)</b>       | 92 (36.95%)  | 164 (45.68%) | <i>ns</i>   |
| <i>Methotrexate</i>                      | 72 (28.92%)  | 130 (36.21%) | <i>ns</i>   |
| <i>Sulphasalazine</i>                    | 9 (3.61%)    | 36 (10.03%)  | <i>0.05</i> |
| <i>Leflunomide</i>                       | 11 (4.42%)   | 15 (4.18%)   | <i>ns</i>   |
| <i>Hydroxychloroquine</i>                | 5 (2.01%)    | 4 (1.11%)    | <i>ns</i>   |
| <i>cyclosporine</i>                      | 2 (0.80%)    | 5 (1.39%)    | <i>ns</i>   |

**Legend:** Data are expressed as mean (standard deviation=SD) unless otherwise specified; range of possible values are indicated in square brackets.

$p \leq 0.05$ . Values were computed by means of a chi-square test (for proportion) or Wilcoxon's test (for continuous data).

PsA, psoriatic arthritis; DIP, distal interphalangeal joints; IBD, inflammatory bowel disease; PASI, Psoriasis Area Severity Index; TJ, Tender Joint; SJ, Swollen Joint; LEI, Leeds Enthesitis Index; DAPSA, Disease Activity Index for Psoriatic Arthritis; Kg, kilogram; cm, centimeter; BMI, body mass index; ESR, erythrocyte sedimentation rate; CRP, C-reactive protein; BASDAI, Bath Ankylosing Spondylitis Disease Activity Index; BASFI, Bath Ankylosing Spondylitis Functional Index; ASDAS, Ankylosing Spondylitis disease activity score; HAQ-S, Health Assessment Questionnaire modified for spondyloarthritis; NSAIDs, non -steroidal inflammatory drugs; csDMARDs, conventional synthetic disease modifying antirheumatic drugs. *ns*=not statistically significant. NA= not applicable
