# Supplementary material for: Effectiveness and safety of secukinumab in 608 patients with psoriatic arthritis in real life: a 24-month prospective, multicentre study
Source: HighWire-hosted journal article supplement (doi:10.1136/rmdopen-2020-001519), 2021-02-01
Supplement: rmdopen-2020-001519supp002_data_supplement.pdf [file rmdopen-2020-001519supp002_data_supplement.pdf]

**Supplementary Table 2. Clinical, functional, disease activity and serological parameters of male (n=249) and female (n=359) PsA patients during 24 months-follow up.**

|                                                  | <b>T0</b>      | <b>T6</b>      | <b>T12</b>     | <b>T24</b>     |
|--------------------------------------------------|----------------|----------------|----------------|----------------|
| <b>TJ [0-68], mean (SD)</b>                      |                |                |                |                |
| Male                                             | 6.17 (5.23)    | 2.35 (3.60)    | 2.44 (4.28)    | 1.47 (3.57)    |
| Female                                           | 9.30 (7.47)    | 4.64 (5.78)    | 3.16 (5.16)    | 1.69 (2.61)    |
| <i>p</i>                                         | <i>p</i> =0.03 | <i>p</i> =0.05 | <i>ns</i>      | <i>ns</i>      |
| <b>SJ [0-66],mean (SD)</b>                       |                |                |                |                |
| Male                                             | 2.18 (2.45)    | 0.63 (1.25)    | 0.49 (1.74)    | 0.25 (0.78)    |
| Female                                           | 2.29 (3.05)    | 0.96 (1.70)    | 0.70 (1.95)    | 0.26 (0.62)    |
| <i>p</i>                                         | <i>ns</i>      | <i>ns</i>      | <i>ns</i>      | <i>ns</i>      |
| <b>LEI [0-6]mean (SD)</b>                        |                |                |                |                |
| Male                                             | 2.34 (1.61)    | 0.54 (1.11)    | 0.23 (0.75)    | 0.19 (0.73)    |
| Female                                           | 2.82 (1.95)    | 1.16 (1.64)    | 0.51 (1.08)    | 0.19 (0.49)    |
| <i>p</i>                                         | <i>ns</i>      | <i>p</i> =0.05 | <i>ns</i>      | <i>ns</i>      |
| <b>Dactylitis [0-20] number digit, mean (SD)</b> |                |                |                |                |
| Male                                             | 0.23 (0.82)    | 0.06 (0.31)    | 0.02 (0.19)    | 0.01 (0.23)    |
| Female                                           | 0.31 (1.51)    | 0.08 (0.55)    | 0.04 (0.32)    | 0.02 (0.14)    |
| <i>p</i>                                         | <i>ns</i>      | <i>ns</i>      | <i>ns</i>      | <i>ns</i>      |
| <b>PASI [0-72] mean (SD)</b>                     |                |                |                |                |
| Male                                             | 4.96 (7.29)    | 1.93 (4.28)    | 1.04 (2.52)    | 0.84 (4.10)    |
| Female                                           | 3.70 (7.42)    | 1.50 (3.61)    | 0.64 (1.92)    | 0.55 (2.04)    |
| <i>p</i>                                         | <i>p</i> =0.05 | <i>ns</i>      | <i>ns</i>      | <i>ns</i>      |
| <b>ESR [0-25](mm/h), mean (SD)</b>               |                |                |                |                |
| Male                                             | 18.99 (18.67)  | 11.79 (10.33)  | 12.50 (12.75)  | 11.52 (11.06)  |
| Female                                           | 22.59 (15.76)  | 18.73 (14.20)  | 16.72 (13.96)  | 17.64 (12.88)  |
| <i>p</i>                                         | <i>p</i> =0.04 | <i>p</i> =0.04 | <i>p</i> =0.05 | <i>p</i> =0.05 |
| <b>CRP [0-6](mg/L), mean (SD)</b>                |                |                |                |                |
| Male                                             | 7.54 (12.10)   | 4.17 (6.75)    | 3.40 (4.63)    | 3.17 (5.07)    |
| Female                                           | 5.70 (7.79)    | 4.09 (5.89)    | 3.49 (5.29)    | 3.75 (5.61)    |
| <i>p</i>                                         | <i>ns</i>      | <i>ns</i>      | <i>ns</i>      | <i>ns</i>      |
| <b>DAPSA [0-164], mean (SD)</b>                  |                |                |                |                |
| Male                                             | 23.77 (11.73)  | 11.64 (8.02)   | 11.28 (9.88)   | 7.92 (8.16)    |
| Female                                           | 26.35 (10.60)  | 16.01 (10.45)  | 12.83 (10.01)  | 7.51 (6.91)    |
| <i>p</i>                                         | <i>ns</i>      | <i>ns</i>      | <i>ns</i>      | <i>ns</i>      |
| <b>ASDAS [0-6], mean (SD)</b>                    |                |                |                |                |
| Male                                             | 3.04 (0.89)    | 1.94 (0.90)    | 1.74 (0.95)    | 1.60 (0.73)    |
| Female                                           | 3.44 (3.76)    | 2.25 (1.13)    | 1.89 (1.08)    | 1.61 (0.65)    |
| <i>p</i>                                         | <i>ns</i>      | <i>ns</i>      | <i>ns</i>      | <i>ns</i>      |
| <b>HAQ-S [0-8], mean (SD)</b>                    |                |                |                |                |
| Male                                             | 1.09 (0.67)    | 0.75 (0.67)    | 0.60 (0.66)    | 0.47 (0.64)    |
| Female                                           | 1.42 (0.91)    | 1.01 (0.68)    | 0.76 (0.73)    | 0.59 (0.64)    |
| <i>p</i>                                         | <i>ns</i>      | <i>ns</i>      | <i>ns</i>      | <i>ns</i>      |
| <b>VAS-pain [0-10], mean (SD)</b>                |                |                |                |                |
| Male                                             | 6.50 (1.78)    | 3.82 (2.25)    | 3.09 (2.47)    | 2.55 (2.36)    |
| Female                                           | 6.84 (1.56)    | 4.68 (2.24)    | 3.42 (2.54)    | 2.52 (2.30)    |
| <i>p</i>                                         | <i>ns</i>      | <i>ns</i>      | <i>ns</i>      | <i>ns</i>      |
| <b>VAS-gh [0-10], mean (SD)</b>                  |                |                |                |                |
| Male                                             | 6.56 (1.54)    | 3.76 (2.19)    | 3.02 (2.40)    | 2.49 (2.20)    |
| Female                                           | 6.84 (4.44)    | 4.65 (2.21)    | 3.18 (2.49)    | 2.35 (2.40)    |

| <i>p</i>                        | <i>ns</i>   | <i>ns</i>   | <i>ns</i>   | <i>ns</i>   |
|---------------------------------|-------------|-------------|-------------|-------------|
| <b>BASDAI [0-10], mean (SD)</b> |             |             |             |             |
| Male                            | 5.18 (2.17) | 3.35 (2.09) | 3.25 (2.21) | 2.61 (1.87) |
| Female                          | 5.25 (2.19) | 3.65 (2.83) | 3.43 (2.12) | 2.59 (1.28) |
| <i>p</i>                        | <i>ns</i>   | <i>ns</i>   | <i>ns</i>   | <i>ns</i>   |
| <b>BASFI [0-10], mean (SD)</b>  |             |             |             |             |
| Male                            | 5.16 (2.27) | 3.49 (2.08) | 2.75 (1.96) | 2.51 (1.60) |
| Female                          | 5.19 (2.05) | 3.93 (1.95) | 2.88 (1.80) | 2.44 (1.02) |
| <i>p</i>                        | <i>ns</i>   | <i>ns</i>   | <i>ns</i>   | <i>ns</i>   |

Data are expressed as mean (SD).  $p \leq 0.05$ . Values were computed by means of a chi-square test (for proportion) or Wilcoxon's test (for continuous data).

Legend: TJ, Tender Joint; SJ, Swollen Joint; LEI, Leeds Enthesitis Index; PASI, Psoriasis Area Severity Index; ESR, erythrocyte sedimentation rate; CRP, C-reactive protein; DAPSA, Disease Activity Index for Psoriatic Arthritis; ASDAS, Ankylosing Spondylitis Disease Activity Score; HAQ: Health Assessment Questionnaire modified for spondyloarthritis; VAS pain, Visual Analogue Scale pain; VAS gh, Visual Analogue Scale global health; BASDAI: Bath Ankylosing Spondylitis Disease Activity Index; BASFI, Bath Ankylosing Spondylitis Functional Index.
